# Supplementary material for: Interaction of Di-2-pyridylketone 2-pyridine Carboxylic Acid Hydrazone and Its Copper Complex with BSA: Effect on Antitumor Activity as Revealed by Spectroscopic Studies
Source: MDPI journal article supplement (doi:10.3390/molecules21050563), 2016-04-28
Supplement: s1 [file s1]

# Supplementary Materials: Interaction of Di-2-pyridylketone 2-pyridine Carboxylic Acid Hydrazone and Its Copper Complex with BSA: Effect on Antitumor Activity as Revealed by Spectroscopic Studies

Cuiping Li, Tengfei Huang, Yun Fu, Youxun Liu, Sufeng Zhou, Zhangyang Qi and Changzheng Li

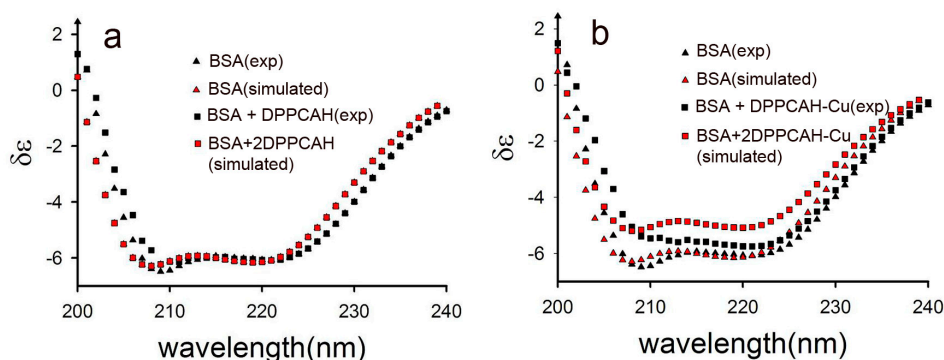

**Figure S1.** The simulated CD experimental data: (a) in the absence or presence of DPPCAH; (b) in the absence or presence of DPPCAH-Cu. The experimental and simulated as indicated in the figures.

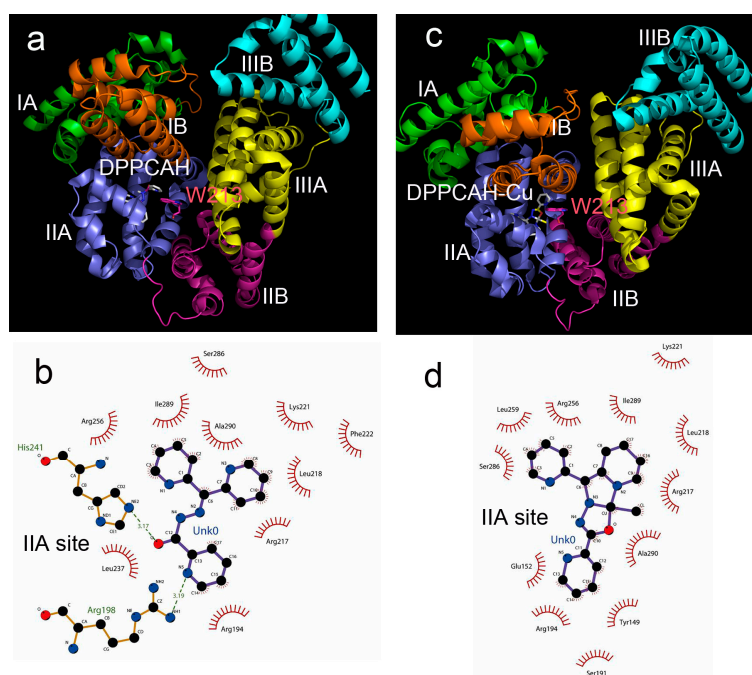

**Figure S2.** The interaction modes between BSA with DPPCAH and DPPCAH-Cu. (a) DPPCAH was located in IIA site; (b) DPPCAH interacted with environment residues (in the figure the Unk0 = DPPCAH); (c) DPPCAH-Cu was located in IIA site; (d) DPPCAH-Cu interacted with environment residues (in the figure the Unk0 = DPPCAH-Cu). Hydrogen bond was indicated by dark green dash lines (S2b,d). The eye-like curved dark red lines represented the hydrophobic contacted residues.
